# Supplementary material for: One-step fabrication of functional carbon dots with long wavelength emission for gene delivery and bio-imaging
Source: Royal Society of Chemistry journal article supplement (doi:10.1039/d1tb01622a), 2021-01-01
Supplement: d1tb01622a1.pdf [file d1tb01622a1.pdf]

# One-Step Fabrication of Functional Carbon Dots with Long Wavelength Emission for Gene Delivery and Bio-imaging

Ping Chen,<sup>a</sup> Xi He,<sup>b</sup> Xiao-Li Tian,<sup>a</sup> Ji Zhang<sup>\*a</sup> and Xiao-Qi Yu<sup>\*a</sup>

<sup>a</sup>Key Laboratory of Green Chemistry and Technology (Ministry of Education), College of Chemistry, Sichuan University, Chengdu, 610064, P. R. China

<sup>b</sup>Department of Critical Care Medicine, West China Hospital, Sichuan University, Chengdu, 610041, P. R. China

\*Corresponding authors: jzhang@scu.edu.cn (J. Zhang); xqyu@scu.edu.cn (X.-Q. Yu).

**Table S1.** Reactants feeds for the synthesis of the CDs.

|                   | PEI 1800Da (mg) | Rh B (mg) | Rh 6G (mg) |
|-------------------|-----------------|-----------|------------|
| <b>PR-CD I</b>    | 460             | 43        | -          |
| <b>PR-CD II</b>   | 460             | 86        | -          |
| <b>PR-CD III</b>  | 460             | 129       | -          |
| <b>PR-CD IV</b>   | 460             | 172       | -          |
| <b>PRG-CD I</b>   | 460             | -         | 43         |
| <b>PRG-CD II</b>  | 460             | -         | 86         |
| <b>PRG-CD III</b> | 460             | -         | 129        |
| <b>PRG-CD IV</b>  | 460             | -         | 172        |

**Table S2.** The C, N and H content of the CDs.

|               | Nitrogen (%) | Carbon (%) | Hydrogen (%) |
|---------------|--------------|------------|--------------|
| <b>PR-CD</b>  | 22.85        | 61.06      | 10.06        |
| <b>PRG-CD</b> | 23.99        | 57.71      | 10.26        |

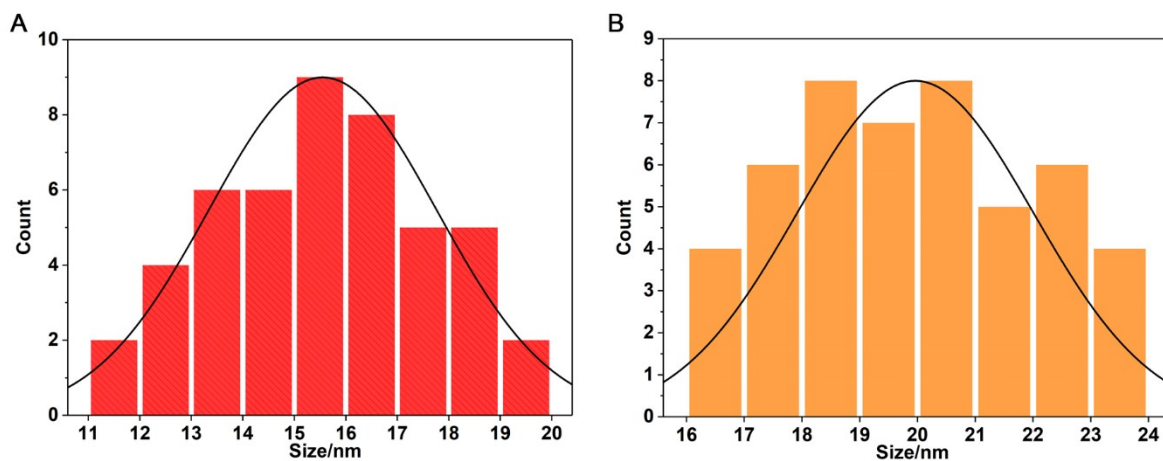

Fig. S1. Size distribution histogram and curve of PR-CD (A) and PRG-CD (B) from TEM.

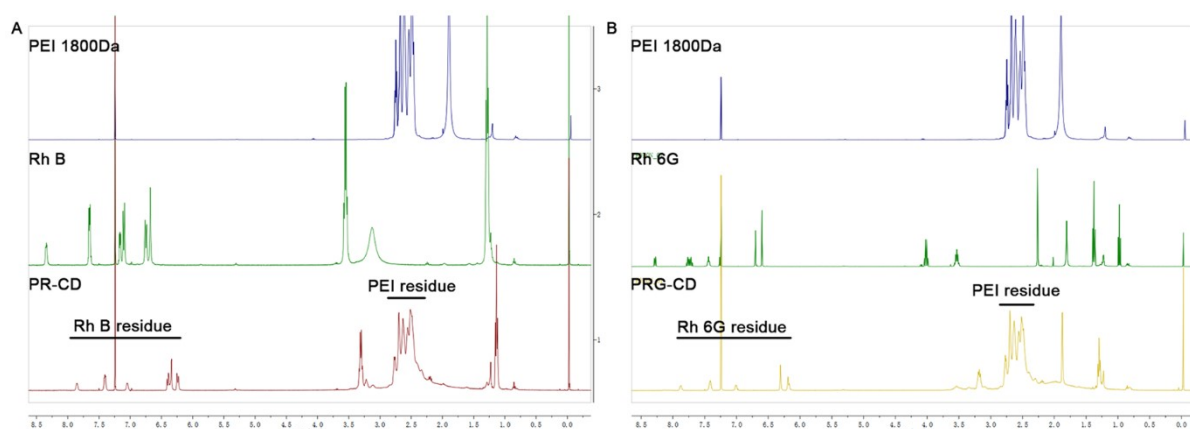

Fig. S2. Comparative <sup>1</sup>H-NMR spectra of PR-CD (left) and PRG-CD (right) and their relevant precursors.

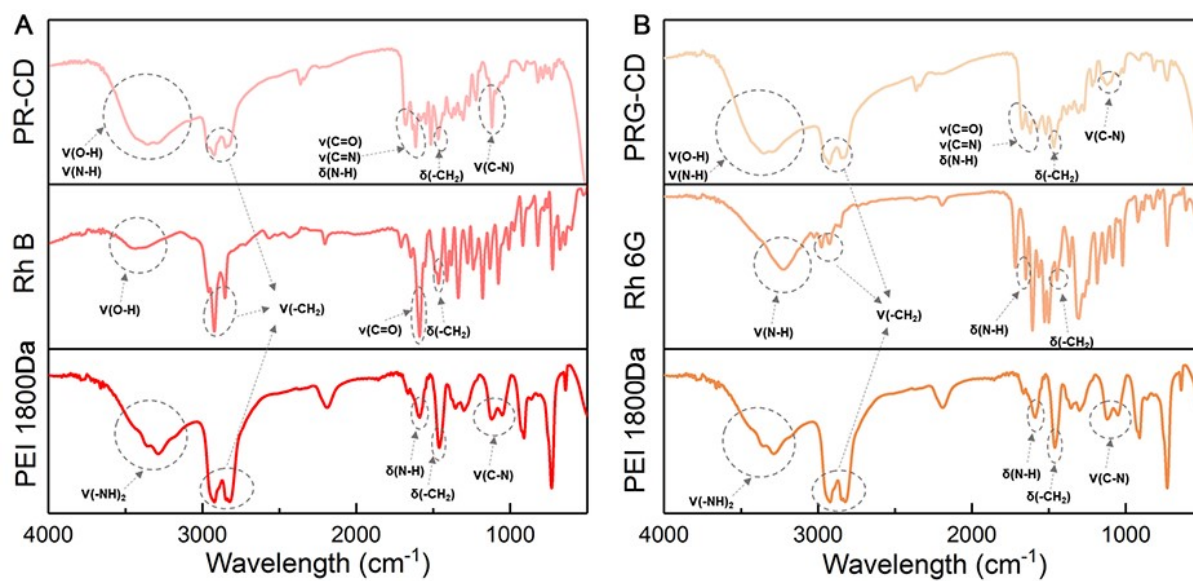

Fig. S3. Comparative FTIR spectra of PR-CD (left) and PRG-CD (right) and their relevant precursors.

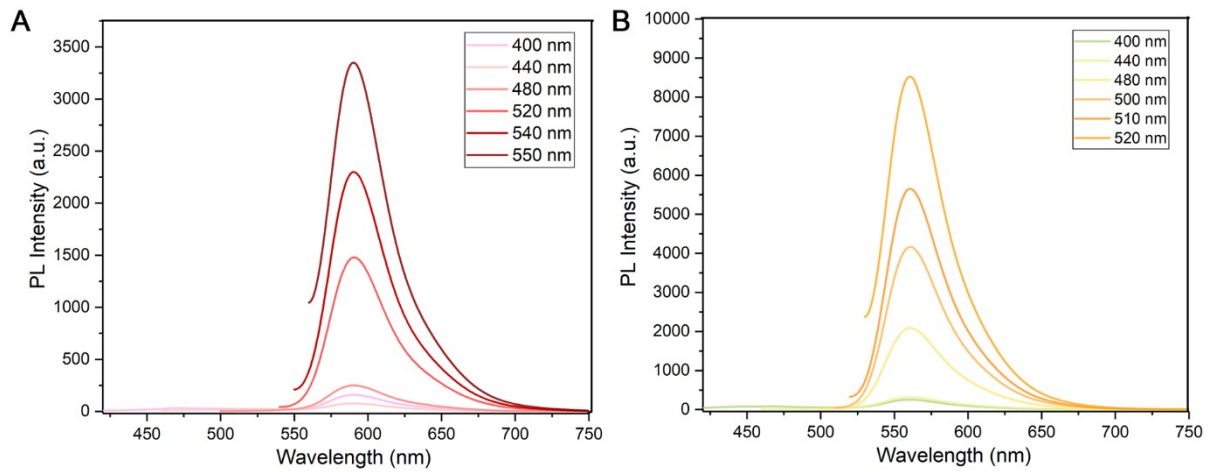

**Fig. S4.** The fluorescence spectra of **PR-CD** (A) and **PRG-CD** (B) under different excitation wavelength.

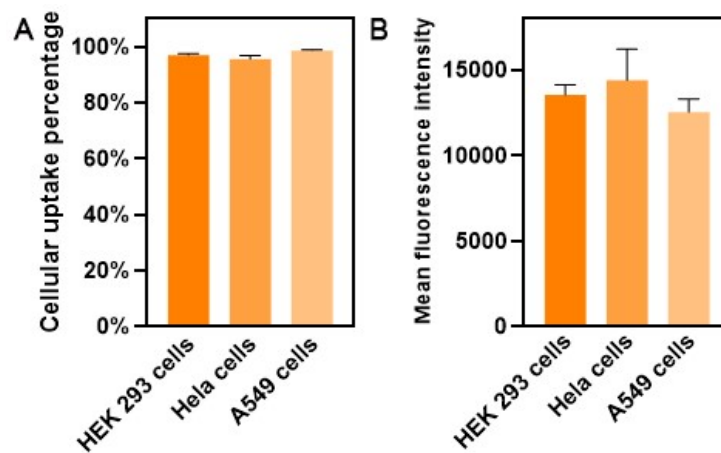

**Fig. S5.** Cellular uptake and mean fluorescence intensity of **PRG-CD** in different types of cells. Data represent mean  $\pm$  SD (n = 3).

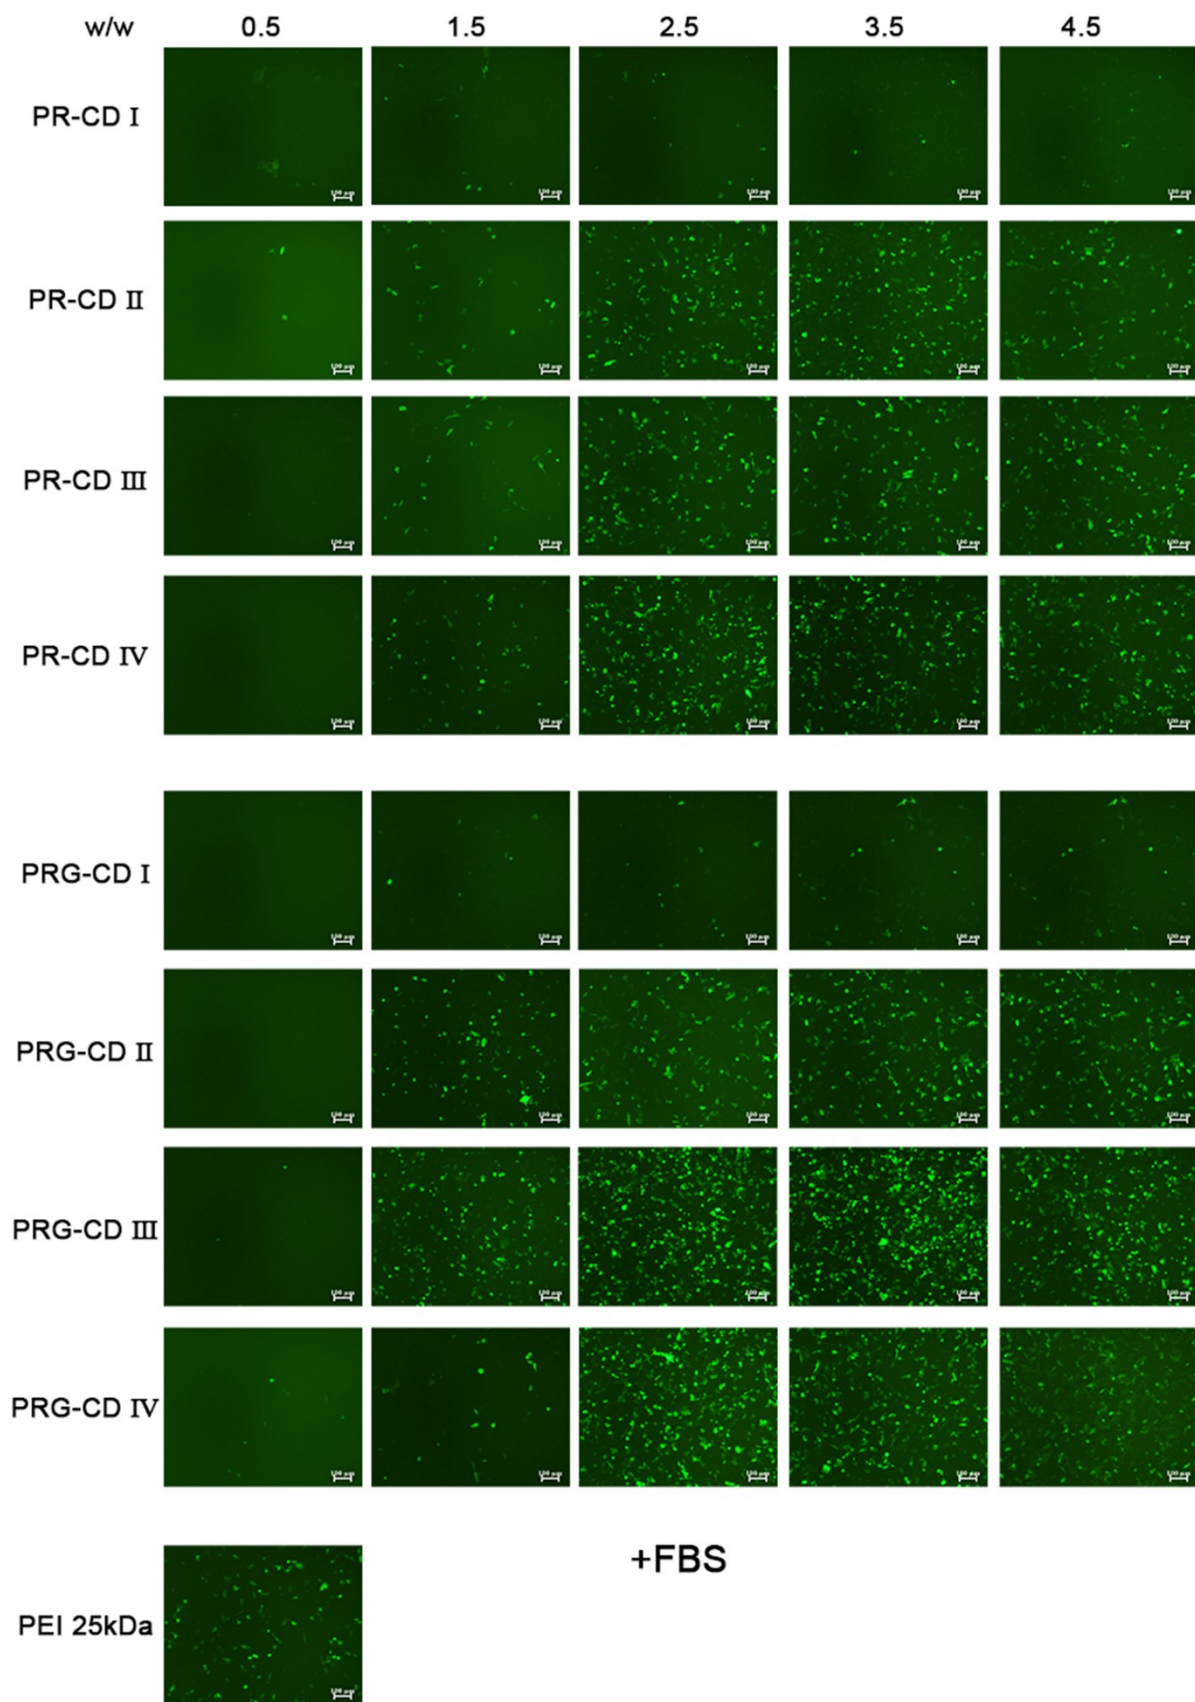

**Fig. S6.** Fluorescence microscopy images of pEGFP transfected by **PR-CD I-IV** and **PRG-CD I-IV** in 7702 cells at various mass ratios. Scale bar = 100  $\mu$ m.

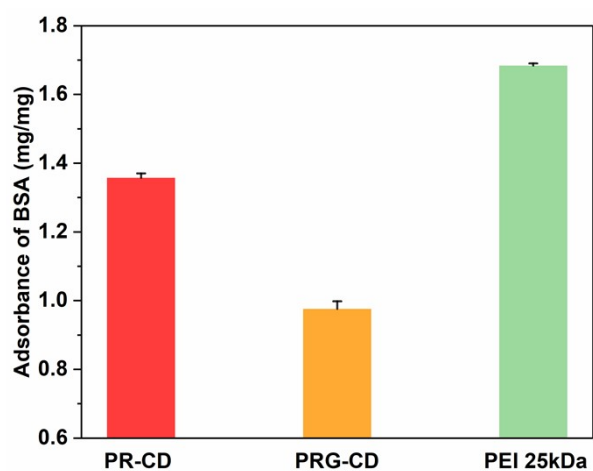

**Fig. S7.** BSA adsorption of the CDs and PEI 25kDa. Data represent mean  $\pm$  SD (n = 3).

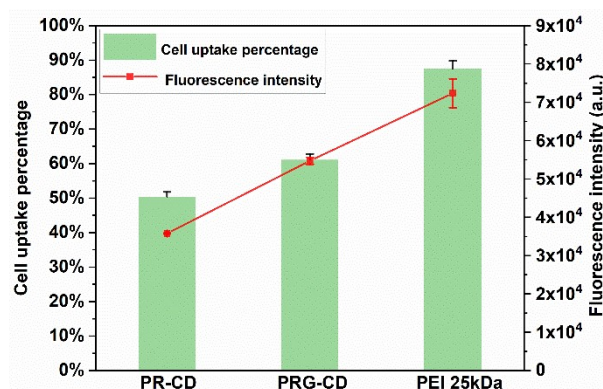

**Fig. S8.** Cellular uptake (columns) and fluorescence intensity (dots) of the vector/Cy5-labeled DNA complexes in B16 cells. Data represent mean  $\pm$  SD (n = 3).

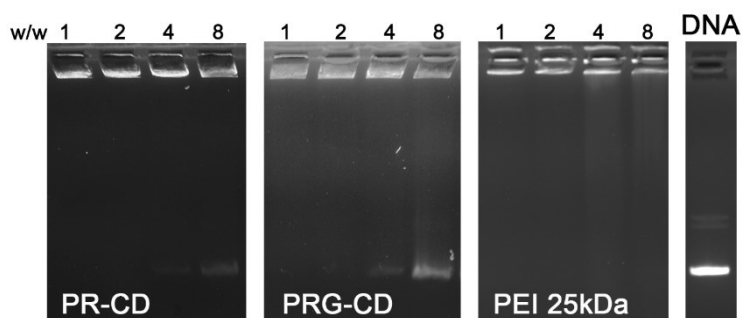

**Fig. S9.** DNA release assay by the addition of heparin at various heparin/DNA mass ratios.



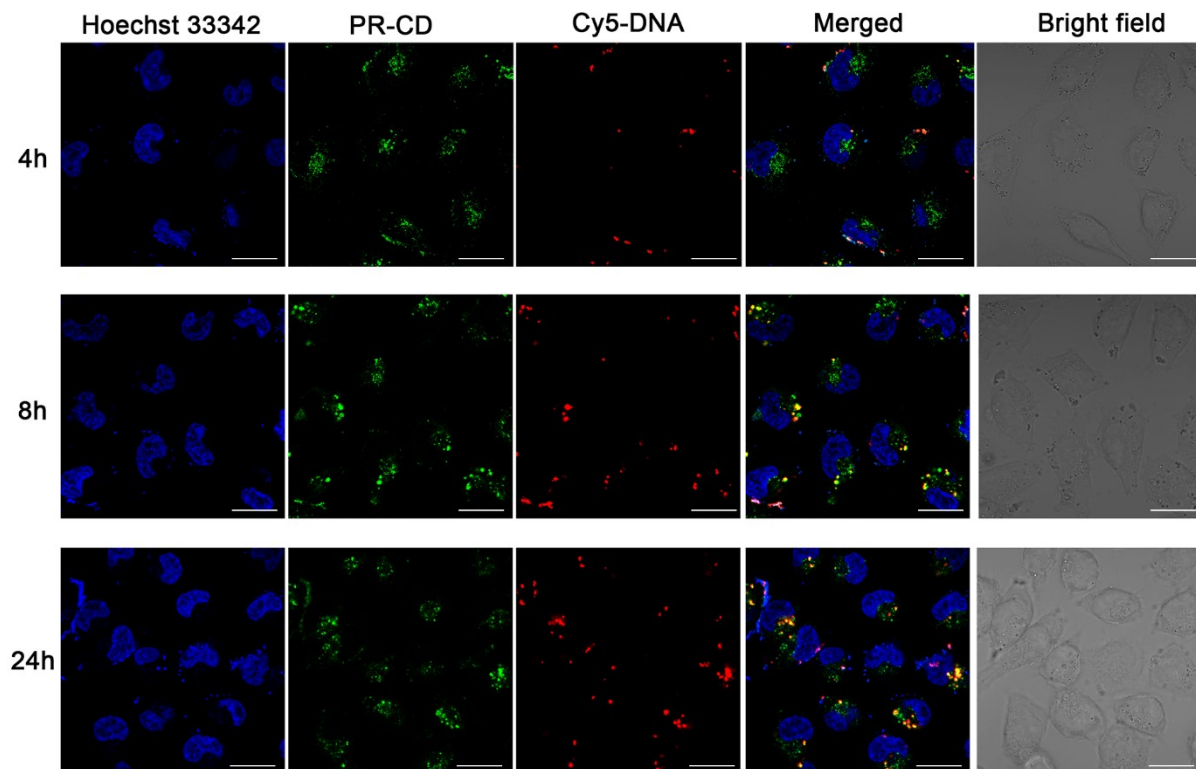

**Fig. S10.** CLSM images of 7702 cells transfected with the **PR-CD**/DNA complexes at a w/w of 3.5 in the presence of 10% serum (DNA was labeled by Cy5 (red), the green channel is **PR-CD** and the nuclei was stained with Hoechst 33342 (blue)). Scale bar = 20  $\mu$ m.
